# Supplementary material
Source: PubMed Central journal article supplement (PMC9610896)
Supplement: bcd-21-0128_supplementary_figure_2_suppsf2.pdf [file bcd-21-0128_supplementary_figure_2_suppsf2.pdf]

Supplementary Figure 2

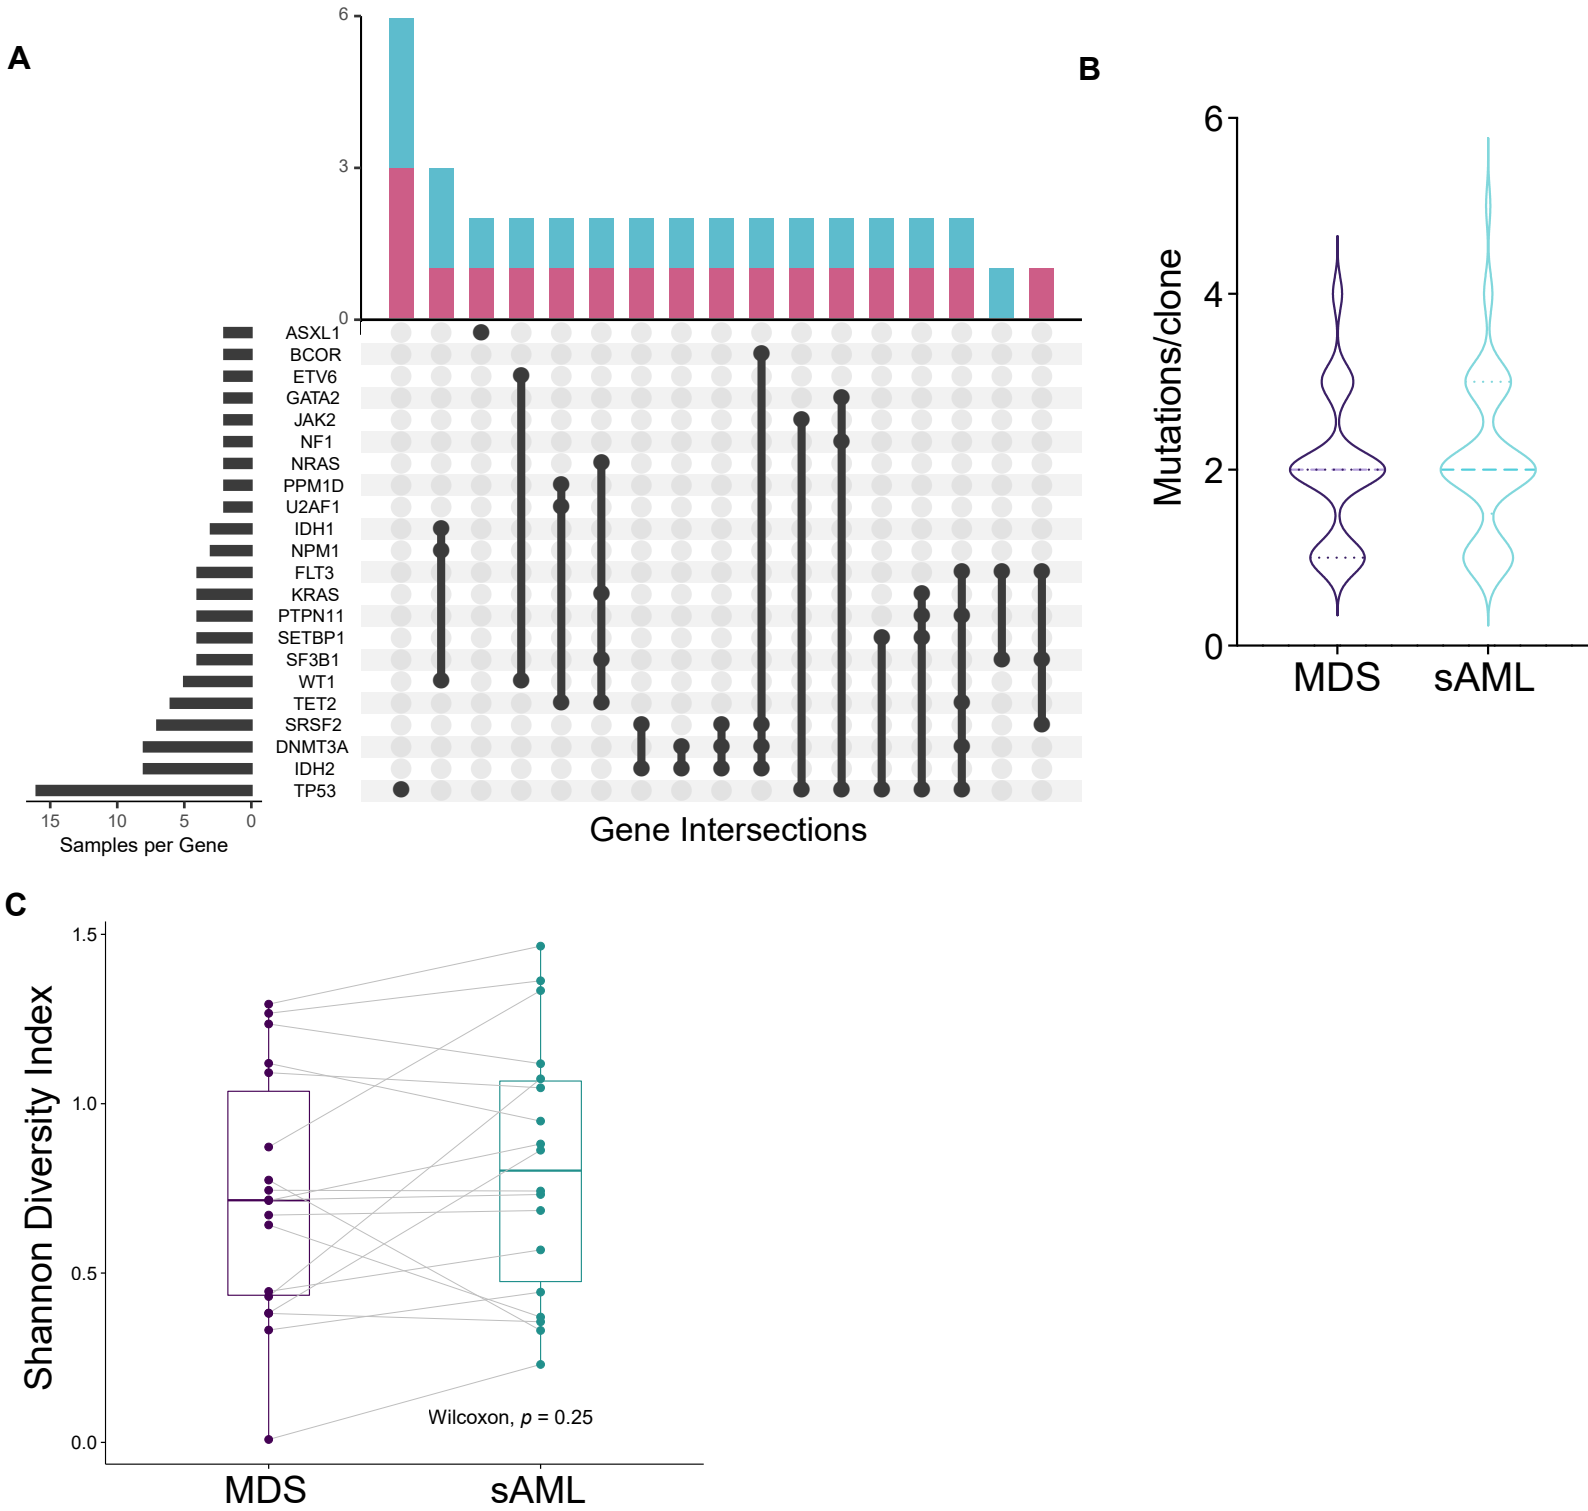

Supplementary Figure 2

**a**, Upset plot depicting co-mutational occurrences in MDS and sAML samples. The number of times a gene was involved in a sample is listed on the left side of the plot. The number of times each gene combination was detected in a sample is listed at the top of the plot. **b**, Violin plot illustrating the number of mutations per clone in MDS and sAML samples. Center line represents median; distal lines represent interquartile range (IQR), 1.5 x IQR. **c**, Box plot portraying differences in clonal diversity for each patient as measured by the Shannon Diversity Index. ( $p = 0.25$ , Wilcoxon rank sum test, center line represents median, box represents interquartile range (IQR), whiskers, 1.5 x IQR).
