# Supplementary material
Source: PubMed Central journal article supplement (PMC9610896)
Supplement: bcd-21-0128_supplementary_figure_3_suppsf3.pdf [file bcd-21-0128_supplementary_figure_3_suppsf3.pdf]

## A. Static

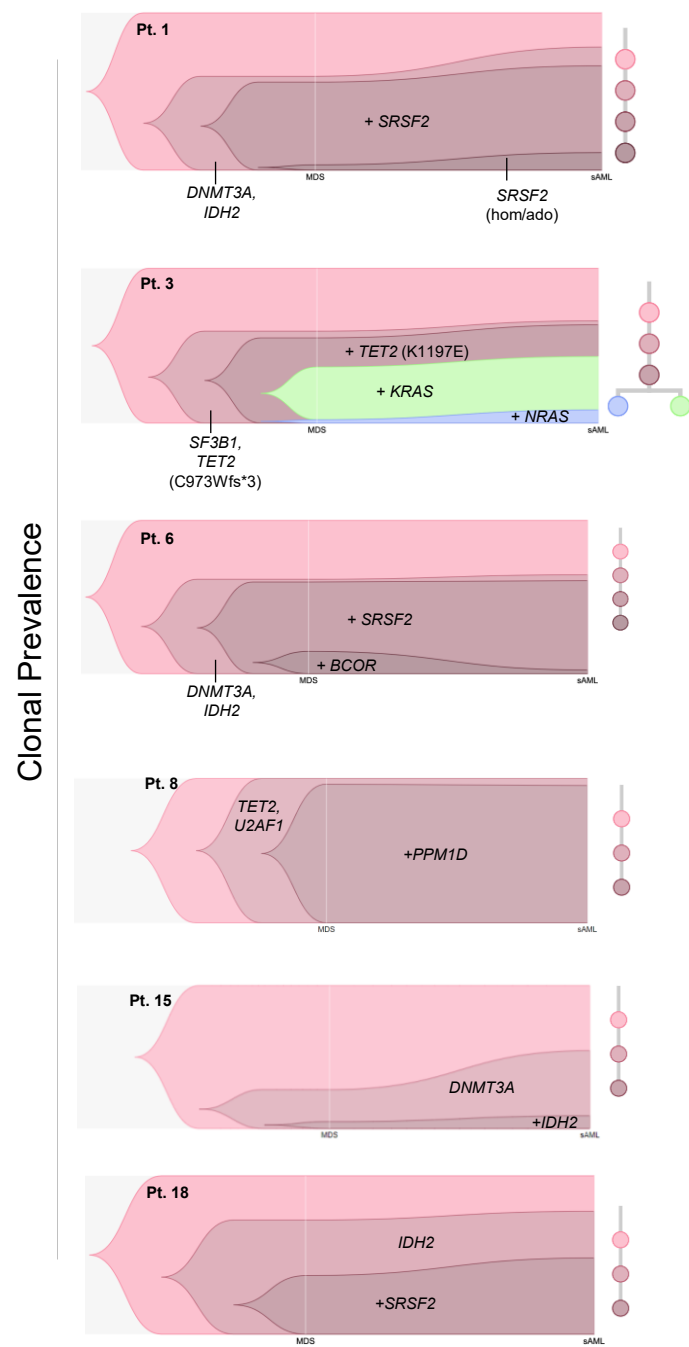

## B. Dynamic-S

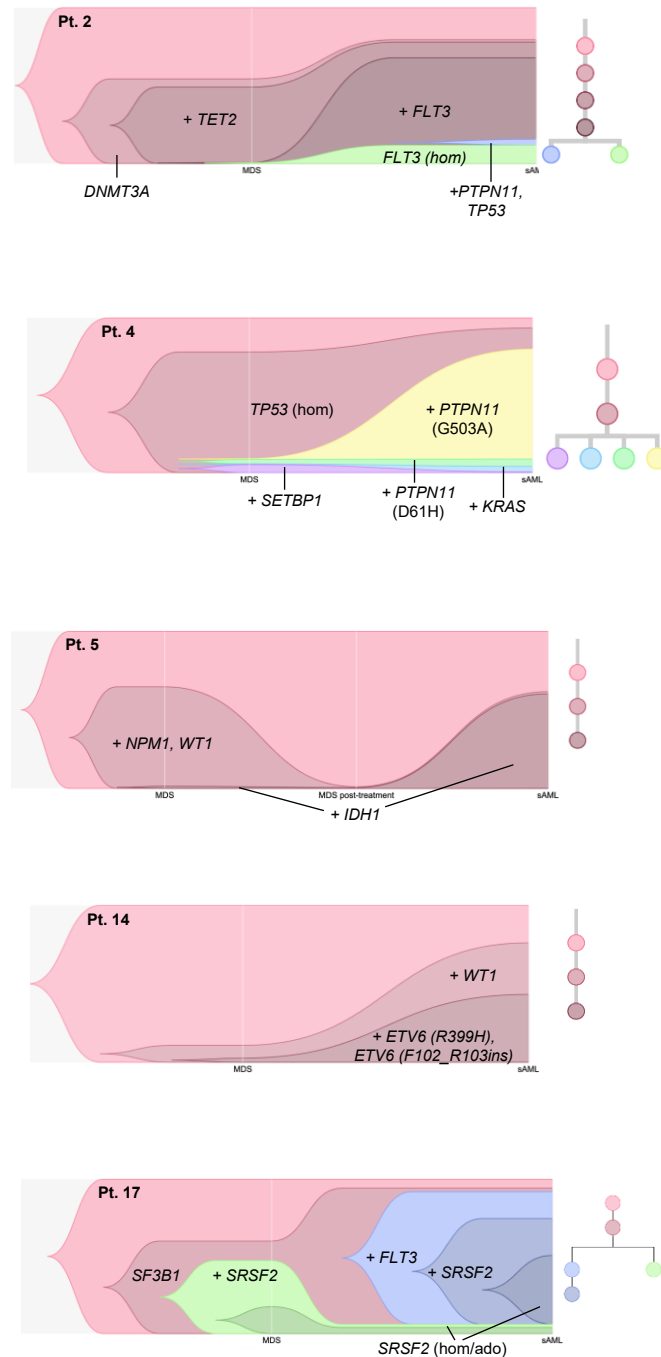

## C. Dynamic-C

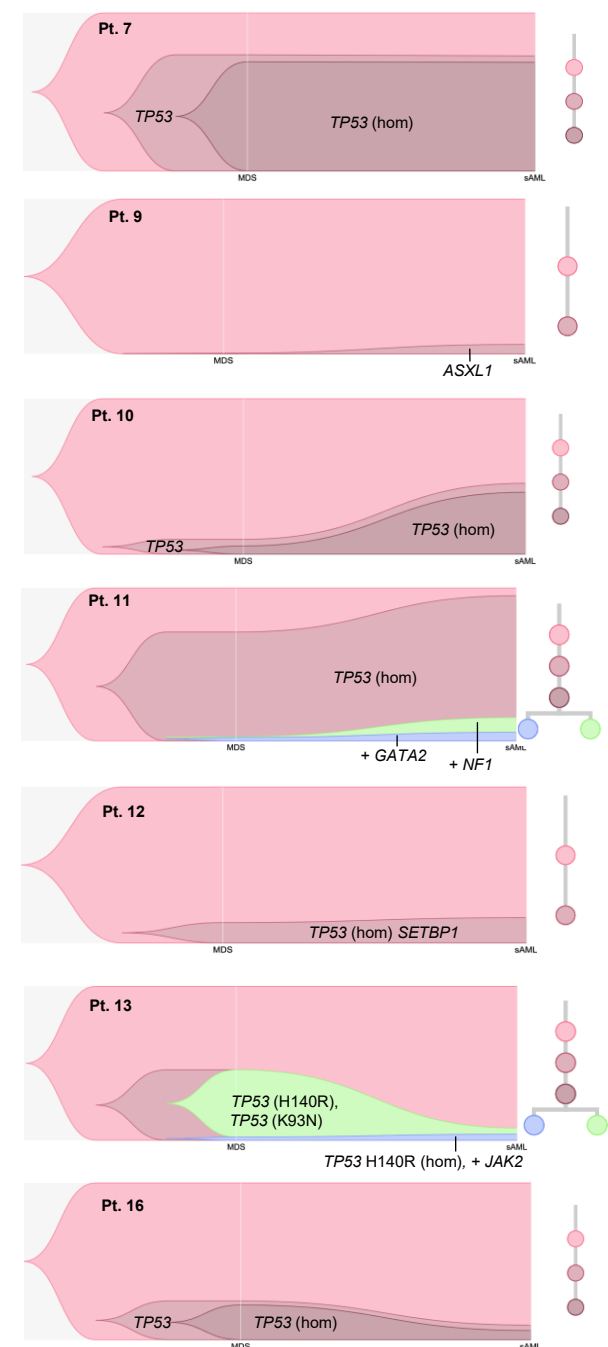

## Supplemental Figure 3

Timescape (or fish plots) of all 18 patients grouped according to clonal progression patterns. **a**, Static **b**, Dynamic-SNV, and **c**, Dynamic-Chromosomal. The left-most clone in each plot represents the parent clone from which all cells were derived (no mutations detected). In most cases, this “normal” (or wild-type) cell population was detected in our analysis. Where it was not (i.e. mutations were detected in every cell), it was generated for visualization purposes and does not extend into the MDS timepoint. Hom/ado = homozygous vs. allele drop out, represents absence of normal allele for a cell, which was typically presumed to mean a loss of heterozygosity event occurred, except when allele-dropout value was close to the cell frequency of the homozygous cells.
