# Supplementary material
Source: PubMed Central journal article supplement (PMC9610896)
Supplement: bcd-21-0128_supplementary_figure_5_suppsf5.pdf [file bcd-21-0128_supplementary_figure_5_suppsf5.pdf]

Supplementary Figure 5

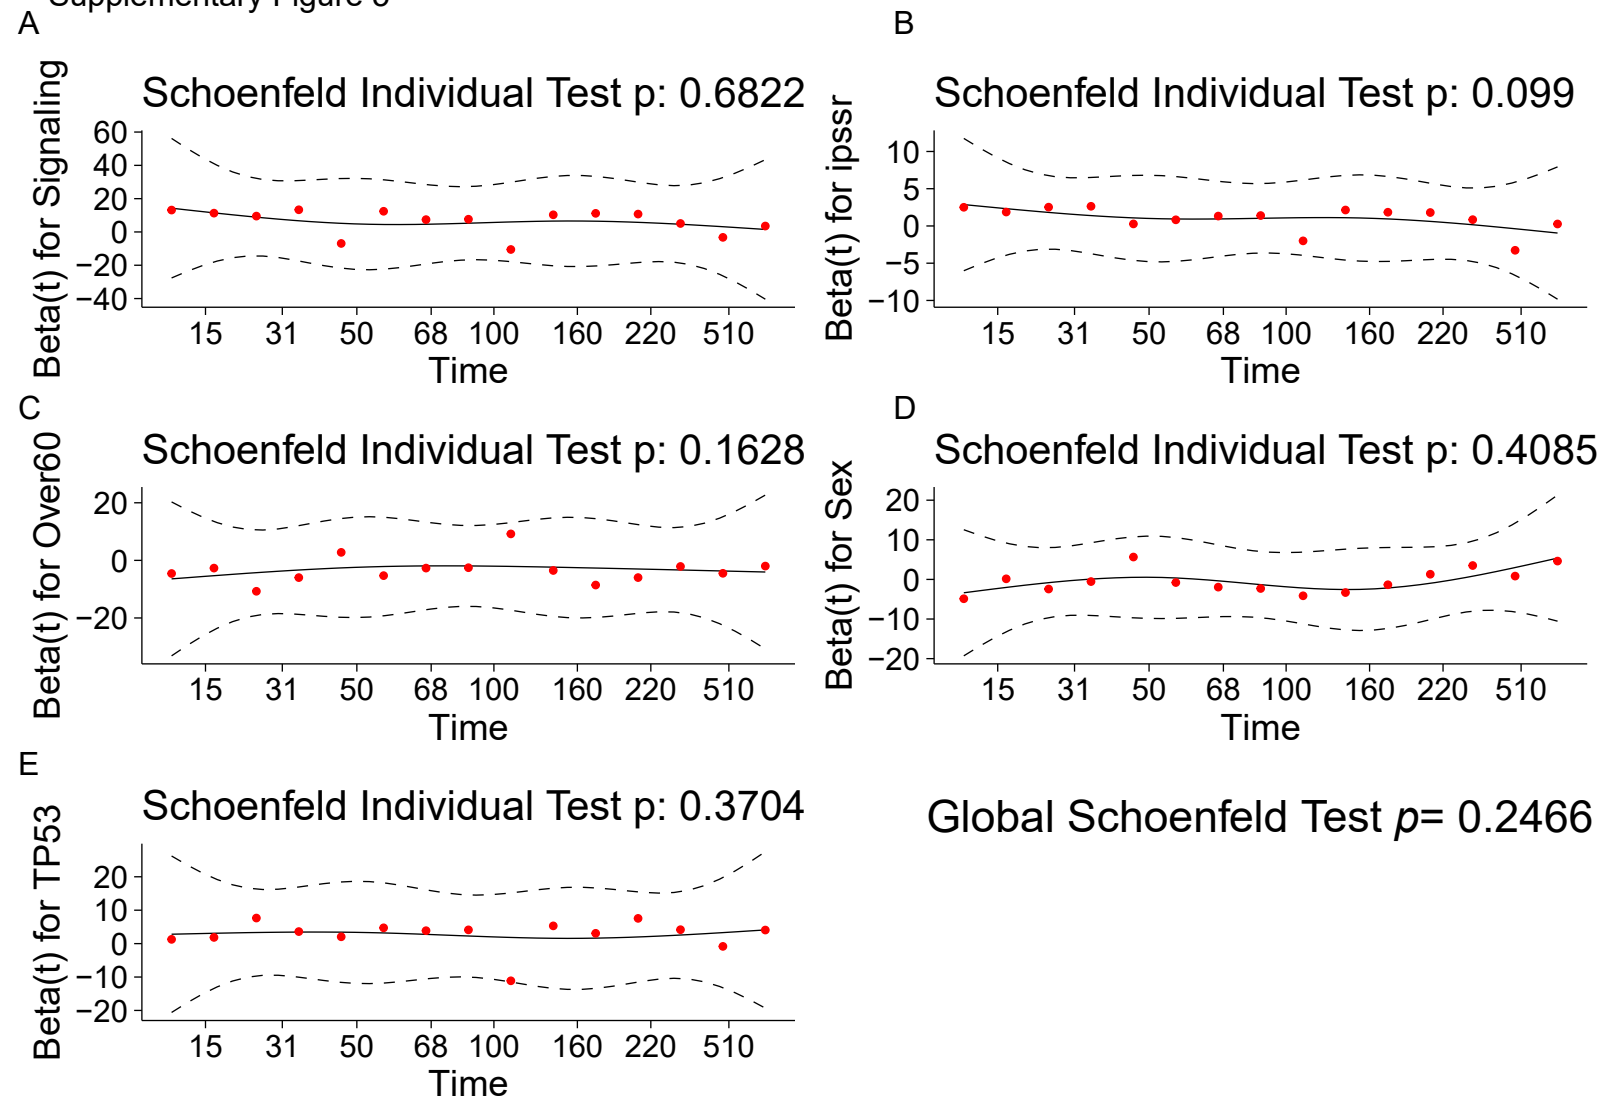

Supplementary Figure 5. The Schoenfeld residuals testing for Cox proportional hazards model in the manuscript is shown for **a**, Signaling mutation **b**, IPSS-R **c**, age over 60 **d**, Sex, **e**, TP53 mutation. The global Schoenfeld test indicates that assumptions for the model are valid.
