# Supplementary material
Source: PubMed Central journal article supplement (PMC9610896)
Supplement: bcd-21-0128_supplementary_figure_7_suppsf7.pdf [file bcd-21-0128_supplementary_figure_7_suppsf7.pdf]

Supplementary Figure 7

**A**

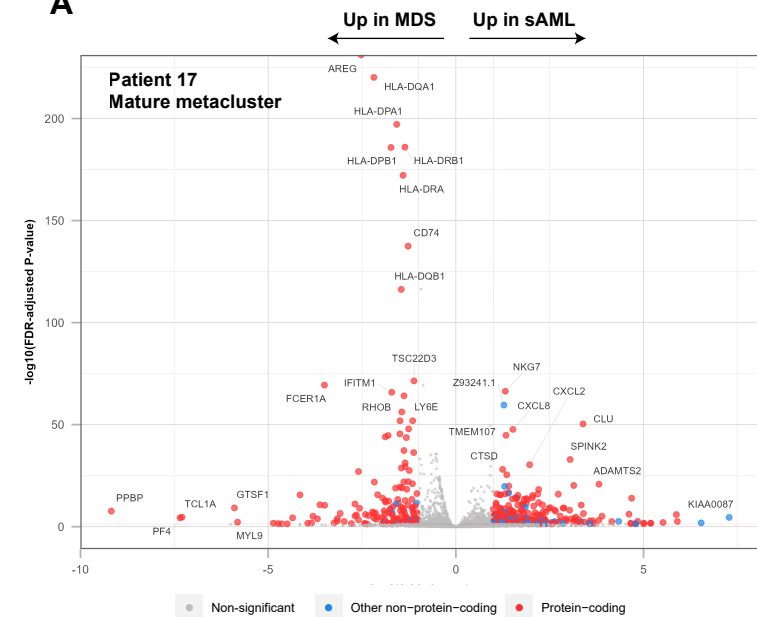

**C**

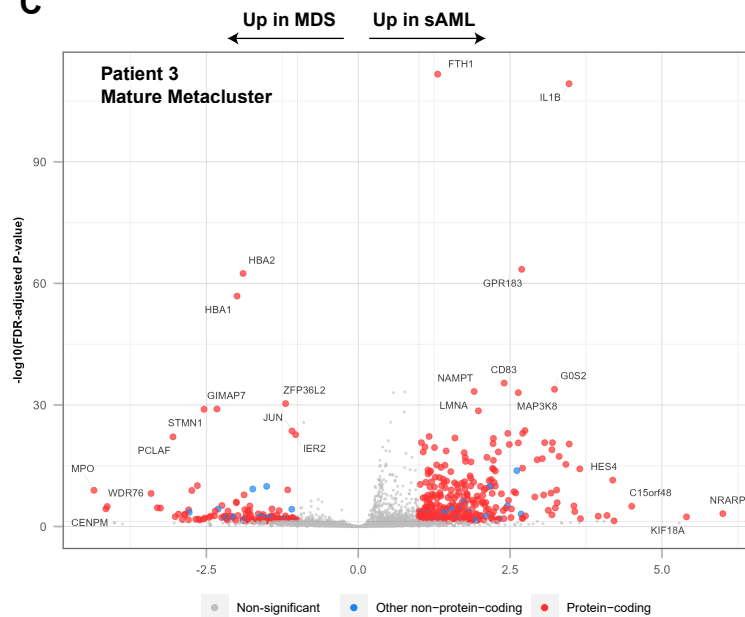

**B**

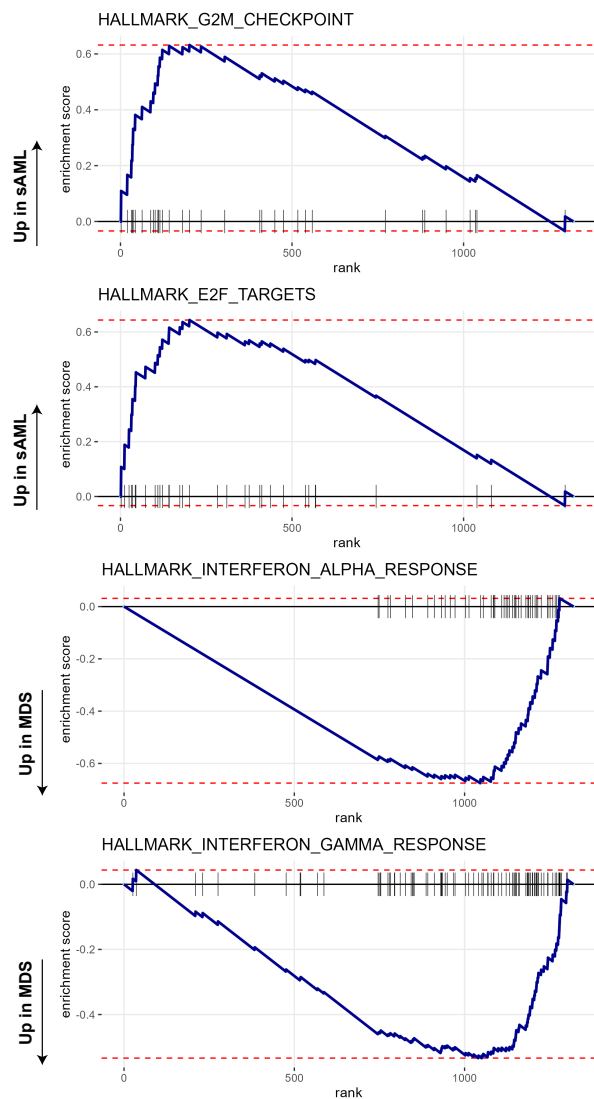

**D**

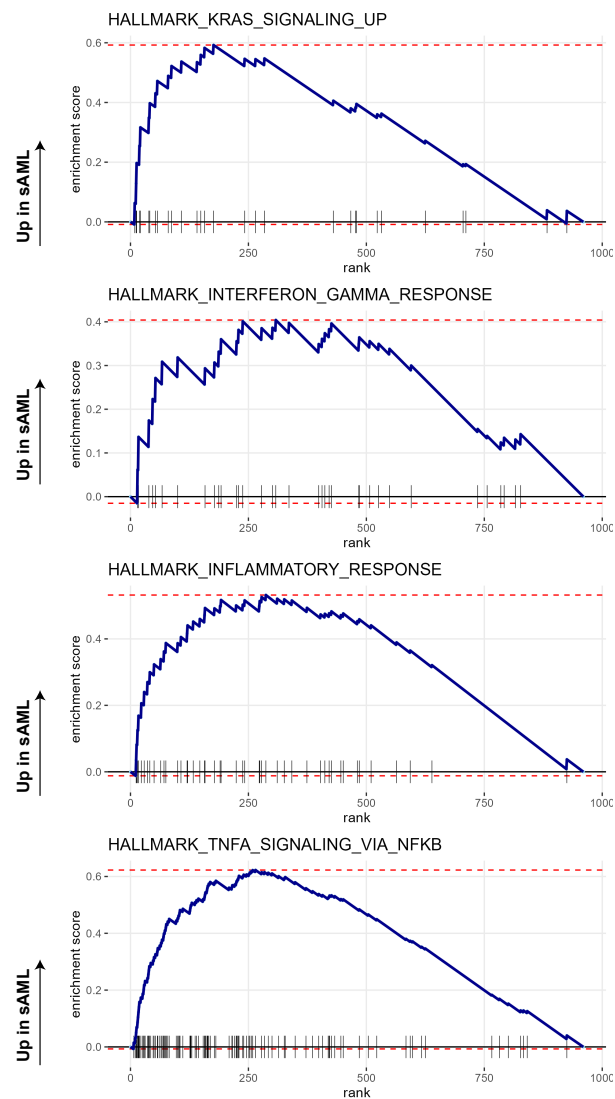

Supplementary Figure 7. **a**, Top 20 differentially expressed genes for mature metacluster for Patient 17, with selected top significant genes labeled **b**, GSEA plots for Patient 17 mature metacluster **c**, Top 20 differentially expressed genes for Patient 3 mature metacluster **d**, Top enriched GSEA plots for Patient 3 mature metacluster
